# Supplementary material for: Sex‐, Race‐ and Ethnicity‐Based Differences in Thromboembolic Events Among Adults Hospitalized With COVID‐19
Source: PubMed Central journal article supplement — J Am Heart Assoc. 2021 Nov 30;10(23):e022829. doi: 10.1161/JAHA.121.022829 (PMC9075407; doi:10.1161/jaha.121.022829), 2021-11-30

# **Supplemental Material**

**Table S1. Patient characteristics overall and by race/ethnicity.**

| <i>Variable</i>               | <i>All patients</i><br>n=21528 (%) | <i>Non-Hispanic White</i><br>n=8202 (%) | <i>Hispanic</i><br>n=5478 (%) | <i>Non-Hispanic Black</i><br>n=5531 (%) | <i>Native American</i><br>n=106 (%) | <i>Asian</i><br>n=857 (%) | <i>Pacific Islander</i><br>n=78 (%) | <i>Other</i><br>n=1276 (%) | <i>p-value</i> |
|-------------------------------|------------------------------------|-----------------------------------------|-------------------------------|-----------------------------------------|-------------------------------------|---------------------------|-------------------------------------|----------------------------|----------------|
| Sex                           |                                    |                                         |                               |                                         |                                     |                           |                                     |                            |                |
| Male                          | 11644 (54.1)                       | 4482 (54.6)                             | 3117 (56.9)                   | 2733 (49.4)                             | 52 (49.1)                           | 478 (55.8)                | 34 (43.6)                           | 748 (58.6)                 | <.001          |
| Female                        | 9884 (45.9)                        | 3720 (45.4)                             | 2361 (43.1)                   | 2798 (50.6)                             | 54 (50.9)                           | 379 (44.2)                | 44 (56.4)                           | 528 (41.4)                 | <.001          |
| Age, year (SD)                | 61.2 (17.9)                        | 67.0 (17.3)                             | 55.2 (17.6)                   | 59.0 (16.6)                             | 58.7 (17.4)                         | 62.4 (17.1)               | 48.4 (16.9)                         | 60.2 (17.9)                | <.001          |
| Deep vein thrombosis          | 725 (3.4)                          | 368 (4.5)                               | 91 (1.7)                      | 217 (3.9)                               | 1 (0.9)                             | 10 (1.2)                  | 0                                   | 38 (3.0)                   | <.001          |
| Pulmonary embolism            | 487 (2.3)                          | 241 (2.9)                               | 40 (0.7)                      | 172 (3.1)                               | 2 (1.9)                             | 8 (0.9)                   | 0                                   | 24 (1.9)                   | <.001          |
| Cerebrovascular disease       | 2608 (12.1)                        | 1054 (12.9)                             | 551 (10.1)                    | 809 (14.6)                              | 13 (12.3)                           | 77 (9.0)                  | 5 (6.4)                             | 99 (7.8)                   | <.001          |
| Stroke                        | 2060 (9.6)                         | 796 (9.7)                               | 436 (8.0)                     | 667 (12.1)                              | 11 (10.4)                           | 64 (7.5)                  | 5 (6.4)                             | 81 (6.3)                   | <.001          |
| Transient ischemic attack     | 625 (2.9)                          | 327 (4.0)                               | 90 (1.6)                      | 178 (3.2)                               | 2 (1.9)                             | 13 (1.5)                  | 0                                   | 15 (1.2)                   | <.001          |
| Coronary artery disease       |                                    |                                         |                               |                                         |                                     |                           |                                     |                            |                |
| Prior CABG                    | 627 (2.9)                          | 401 (4.9)                               | 72 (1.3)                      | 98 (1.8)                                | 2 (1.9)                             | 17 (2.0)                  | 3 (3.8)                             | 34 (2.7)                   | <.001          |
| Prior PCI                     | 986 (4.6)                          | 568 (6.9)                               | 138 (2.5)                     | 187 (3.4)                               | 1 (0.9)                             | 39 (4.6)                  | 1 (1.3)                             | 52 (4.1)                   | <.001          |
| Prior myocardial infarction   | 1199 (5.6)                         | 639 (7.8)                               | 174 (3.2)                     | 286 (5.2)                               | 8 (7.5)                             | 33 (3.9)                  | 4 (5.1)                             | 55 (4.3)                   | <.001          |
| Peripheral arterial disease   | 584 (2.7)                          | 285 (3.5)                               | 82 (1.5)                      | 178 (3.2)                               | 2 (1.9)                             | 12 (1.4)                  | 0                                   | 25 (2.0)                   | <.001          |
| Smoking history               | 1406 (6.5)                         | 603 (7.4)                               | 246 (4.5)                     | 418 (7.6)                               | 14 (13.2)                           | 42 (4.9)                  | 2 (2.6)                             | 81 (6.3)                   | <.001          |
| Hypertension                  | 12673 (58.9)                       | 5173 (63.1)                             | 2419 (44.2)                   | 3838 (69.4)                             | 62 (58.5)                           | 471 (55.0)                | 35 (44.9)                           | 675 (52.9)                 | <.001          |
| Diabetes                      | 7614 (35.4)                        | 2600 (31.7)                             | 1844 (33.7)                   | 2355 (42.6)                             | 46 (43.4)                           | 308 (35.9)                | 33 (42.3)                           | 428 (33.5)                 | <.001          |
| Dyslipidemia                  | 7423 (34.5)                        | 3480 (42.4)                             | 1286 (23.5)                   | 1914 (34.6)                             | 34 (32.1)                           | 310 (36.2)                | 19 (24.4)                           | 380 (29.8)                 | <.001          |
| Heart failure                 | 2500 (11.6)                        | 1244 (15.2)                             | 314 (5.7)                     | 771 (13.9)                              | 13 (12.3)                           | 54 (6.3)                  | 7 (9.0)                             | 97 (7.6)                   | <.001          |
| Atrial fibrillation / flutter | 2089 (9.7)                         | 1342 (16.4)                             | 242 (4.4)                     | 357 (6.5)                               | 5 (4.7)                             | 58 (6.8)                  | 4 (5.1)                             | 81 (6.3)                   | <.001          |
| Chronic kidney disease        | 2784 (12.9)                        | 1131 (13.8)                             | 450 (8.2)                     | 974 (17.6)                              | 9 (8.5)                             | 79 (9.2)                  | 7 (9.0)                             | 134 (10.5)                 | <.001          |
| Hemodialysis                  | 741 (3.4)                          | 155 (1.9)                               | 203 (3.7)                     | 318 (5.7)                               | 2 (1.9)                             | 29 (3.4)                  | 2 (2.6)                             | 32 (2.5)                   | <.001          |
| Cancer                        | 2680 (12.4)                        | 1340 (16.3)                             | 477 (8.7)                     | 647 (11.7)                              | 12 (11.3)                           | 80 (9.4)                  | 6 (7.7)                             | 118 (9.2)                  | <.001          |
| Pulmonary disease             | 4015 (18.7)                        | 1994 (24.3)                             | 580 (10.6)                    | 1076 (19.5)                             | 23 (21.7)                           | 126 (14.7)                | 14 (17.9)                           | 202 (15.8)                 | <.001          |
| Body mass index, mean (SD)    | 30.8 (8.5)                         | 30.3 (8.5)                              | 30.6 (7.5)                    | 32.5 (9.3)                              | 30.8 (8.5)                          | 26.1 (5.6)                | 35.4 (10.2)                         | 29.7 (7.3)                 | <.001          |
| Missing                       | 2,422                              | 677                                     | 903                           | 510                                     | 10                                  | 101                       | 4                                   | 217                        |                |

Note: Missing values are noted where relevant. Race/ethnicity and sex are defined as determined by the registry during data collection. SD, standard deviation; CABG, coronary artery bypass grafting; PCI, percutaneous coronary intervention.

**Table S2. Thromboembolic events and antithrombotic treatment of patients, overall and by race/ethnicity.**

| <i>Variable</i>                       | <i>All patients</i> | <i>Non-Hispanic White</i> | <i>Hispanic</i> | <i>Non-Hispanic Black</i> | <i>Native American</i> | <i>Asian</i>   | <i>Pacific Islander</i> | <i>Other</i>    |
|---------------------------------------|---------------------|---------------------------|-----------------|---------------------------|------------------------|----------------|-------------------------|-----------------|
|                                       | n=21528 (%)         | n=8202 (%)                | n=5478 (%)      | n=5531 (%)                | n=106 (%)              | n=857 (%)      | n=78 (%)                | n=1276 (%)      |
| <b>Venous thromboembolic events</b>   |                     |                           |                 |                           |                        |                |                         |                 |
| DVT (+/- PE)                          | 508 (2.4)           | 176 (2.1)                 | 110 (2.0)       | 171 (3.1)                 | 2 (1.9)                | 15 (1.8)       | 1 (1.3)                 | 33 (2.6)        |
| PE (+/-DVT)                           | 385 (1.8)           | 168 (2.0)                 | 57 (1.0)        | 131 (2.4)                 | 1 (0.9)                | 8 (0.9)        | 0                       | 20 (1.6)        |
| <b>Arterial thromboembolic events</b> |                     |                           |                 |                           |                        |                |                         |                 |
| Acute limb ischemia                   | 44 (0.2)            | 12 (0.1)                  | 6 (0.1)         | 23 (0.4)                  | 0                      | 2 (0.2)        | 0                       | 1 (0.1)         |
| Myocardial infarction                 | 655 (3.0)           | 289 (3.5)                 | 91 (1.7)        | 205 (3.7)                 | 5 (4.7)                | 26 (3.0)       | 3 (3.8)                 | 36 (2.8)        |
| Ischemic stroke                       | 168 (0.8)           | 61 (0.7)                  | 28 (0.5)        | 57 (1.0)                  | 0                      | 11 (1.3)       | 0                       | 11 (0.9)        |
| Left ventricular thrombus             | 168 (0.8)           | 5 (0.1)                   | 6 (0.1)         | 9 (0.2)                   | 0                      | 0              | 0                       | 1 (0.1)         |
| <b>Bleeding requiring transfusion</b> | 747 (3.5)           | 246 (3.0)                 | 148 (2.7)       | 255 (4.6)                 | 7 (6.6)                | 28 (3.3)       | 3 (3.8)                 | 40 (3.1)        |
| <b>Required ICU care</b>              | 6604 (30.7)         | 2732 (33.3)               | 1430 (26.1)     | 1741 (31.5)               | 41 (38.7)              | 277 (32.3)     | 18 (23.1)               | 365 (28.6)      |
| Missing                               | 101                 |                           |                 |                           |                        |                |                         |                 |
| <b>Severe COVID-19*</b>               | 4347 (20.3)         | 1553 (19.1)               | 1067 (19.6)     | 1217 (22.1)               | 26 (24.7)              | 199 (23.3)     | 7 (9.1)                 | 278 (21.9)      |
| Missing                               | 104                 | 32                        | 39              | 18                        | 1                      | 2              | 1                       | 11              |
| <b>Hospital Length of Stay</b>        |                     |                           |                 |                           |                        |                |                         |                 |
| Mean (SD)                             | 10.0 (11.4)         | 9.9 (11.1)                | 9.9 (11.9)      | 10.3 (11.3)               | 11.5 (11.7)            | 9.7 (11.2)     | 9.6 (11.4)              | 10.0 (12.2)     |
| Median (IQR)                          | 6.5 (3.6-11.7)      | 6.6 (3.6-11.8)            | 5.9 (3.6-7.9)   | 6.6 (3.6-12.5)            | 7.6 (4.6-3.7)          | 6.4 (3.6-11.6) | 5.6 (3.6- 9.9)          | 6.0 (3.5- 11.5) |
| <b>Death</b>                          | 3326 (15.4)         | 1404 (17.1)               | 733 (13.4)      | 792 (14.3)                | 19 (17.9)              | 145 (16.9)     | 4 (5.1)                 | 229 (17.9)      |
| <b>Prehospital antithrombotics</b>    |                     |                           |                 |                           |                        |                |                         |                 |
| Antiplatelet                          | 5819 (27.1)         | 2754 (33.7)               | 913 (16.7)      | 1649 (29.9)               | 32 (30.2)              | 188 (22.0)     | 7 (9.0)                 | 276 (21.8)      |
| Missing                               | 70                  | 19                        | 23              | 16                        | 0                      | 1              | 0                       | 11              |
| Aspirin                               | 5327 (24.8)         | 2495 (30.5)               | 850 (15.6)      | 1523 (27.6)               | 30 (28.3)              | 172 (20.1)     | 7 (9.0)                 | 250 (19.8)      |
| P2y12 inhibitor                       | 968 (4.5)           | 512 (6.3)                 | 132 (2.4)       | 244 (4.4)                 | 4 (3.8)                | 25 (2.9)       | 1 (1.3)                 | 50 (4.0)        |

|                                   |             |             |             |             |           |            |           |            |
|-----------------------------------|-------------|-------------|-------------|-------------|-----------|------------|-----------|------------|
| Other antiplatelet                | 150 (0.7)   | 65 (0.8)    | 14 (0.3)    | 60 (1.1)    | 2 (1.9)   | 4 (0.5)    | 0         | 5 (0.4)    |
| Dual antiplatelet                 | 621 (2.9)   | 314 (3.8)   | 83 (1.5)    | 177 (3.2)   | 4 (3.8)   | 13 (1.5)   | 1 (1.3)   | 29 (2.3)   |
| Anticoagulant                     | 2964 (14.1) | 1503 (18.7) | 548 (10.2)  | 720 (13.3)  | 9 (8.5)   | 62 (7.4)   | 5 (6.4)   | 117 (9.3)  |
| Missing                           | 442         | 163         | 102         | 135         | 0         | 18         | 0         | 24         |
| Direct thrombin inhibitor         | 109 (0.5)   | 75 (0.9)    | 15 (0.3)    | 14 (0.3)    | 0         | 0          | 0         | 5 (0.4)    |
| Factor Xa inhibitor               | 1429 (0.7)  | 825 (10.3)  | 160 (3.0)   | 340 (6.3)   | 3 (2.8)   | 31 (3.7)   | 3 (3.8)   | 67 (5.4)   |
| Warfarin                          | 519 (2.5)   | 315 (3.9)   | 59 (1.1)    | 119 (2.2)   | 2 (1.9)   | 5 (0.6)    | 1 (1.3)   | 18 (1.4)   |
| Other anticoagulant               | 937 (4.4)   | 297 (3.7)   | 319 (5.9)   | 261 (4.8)   | 4 (3.1)   | 26 (3.1)   | 2 (2.6)   | 28 (2.2)   |
| <b>In hospital anticoagulants</b> |             |             |             |             |           |            |           |            |
| Prophylactic dose anticoagulant   |             |             |             |             |           |            |           |            |
| Subcutaneous heparin              | 3468 (25.0) | 1328 (23.0) | 629 (20.0)  | 1174 (32.2) | 21 (25.9) | 109 (23.6) | 11 (19.3) | 196 (28.5) |
| Missing                           | 7681        | 2431        | 2332        | 1889        | 25        | 395        | 21        | 588        |
| LMWH - low dose                   | 6547 (47.4) | 2612 (45.3) | 1665 (53.1) | 1553 (42.7) | 45 (55.6) | 290 (63.3) | 34 (59.6) | 348 (50.7) |
| Missing                           | 7706        | 2440        | 2340        | 1891        | 25        | 399        | 21        | 590        |
| Therapeutic dose anticoagulant    |             |             |             |             |           |            |           |            |
| Intravenous heparin               | 1381 (10.0) | 576 (10.0)  | 218 (7.0)   | 444 (12.2)  | 7 (8.6)   | 37 (8.0)   | 4 (7.0)   | 95 (14.0)  |
| Missing                           | 7695        | 2422        | 2356        | 1881        | 25        | 393        | 21        | 597        |
| LMWH - intermediate dose          | 1717 (12.4) | 613 (10.6)  | 477 (15.2)  | 467 (12.8)  | 9 (11.1)  | 55 (11.8)  | 8 (14.0)  | 88 (12.8)  |
| Missing                           | 7679        | 2430        | 2338        | 1883        | 25        | 392        | 21        | 590        |
| LMWH - full dose                  | 1623 (11.7) | 634 (11.0)  | 447 (14.2)  | 395 (10.8)  | 4 (4.9)   | 41 (8.8)   | 4 (7.0)   | 98 (14.3)  |
| Missing                           | 7673        | 2425        | 2336        | 1885        | 25        | 392        | 21        | 589        |
| Argatroban                        | 78 (0.6)    | 25 (0.4)    | 15 (0.5)    | 23 (0.6)    | 0         | 7 (1.5)    | 0         | 8 (1.2)    |
| Missing                           | 7493        | 2318        | 2330        | 1825        | 25        | 390        | 21        | 584        |
| Bivalirudin                       | 26 (0.2)    | 8 (0.1)     | 7 (0.2)     | 10 (0.3)    | 0         | 0          | 0         | 1 (0.1)    |
| Missing                           | 7493        | 2319        | 2328        | 1825        | 25        | 390        | 21        | 585        |
| DOAC                              | 1460 (10.4) | 770 (5.8)   | 183 (5.8)   | 404 (10.9)  | 6 (7.4)   | 27 (5.8)   | 4 (7.0)   | 66 (9.6)   |
| Missing                           | 7500        | 2326        | 2329        | 1824        | 25        | 390        | 21        | 585        |

|             |            |           |           |           |         |          |         |          |
|-------------|------------|-----------|-----------|-----------|---------|----------|---------|----------|
| Apixaban    | 1108 (7.9) | 561 (9.5) | 145 (4.6) | 317 (8.6) | 6 (7.4) | 22 (4.7) | 3 (5.3) | 54 (7.8) |
| Dabigatran  | 22 (0.1)   | 18 (0.3)  | 1 (<0.1)  | 2. (0.1)  | 0       | 0        | 0       | 1 (0.1)  |
| Edoxaban    | 1 (<0.1)   | 0         | 0         | 0         | 0       | 0        | 0       | 1 (0.1)  |
| Rivaroxaban | 319 (2.3)  | 187 (3.2) | 35 (1.1)  | 82 (2.2)  | 0       | 4 (0.9)  | 1 (1.8) | 10 (1.4) |
| Warfarin    | 330 (2.4)  | 196 (3.3) | 45 (1.4)  | 73 (2.0)  | 1 (1.2) | 3 (0.6)  | 1 (1.8) | 11 (1.6) |
| Missing     | 7510       | 2331      | 2331      | 1825      | 25      | 390      | 21      | 587      |

Note: Percentages are calculated out of the number of non-missing values for that variable. The number of missings for each variable is noted in the table where necessary. Race/ethnicity is defined as determined by the registry. Severe COVID-19 is defined as the need for invasive mechanical ventilation, extracorporeal circulatory or pulmonary support, or vasopressor or inotropes. DVT, deep vein thrombosis; PE, pulmonary embolism; ICU, intensive care unit; LMWH, low molecular weight heparin; DOAC, direct oral anticoagulant.

**Figure S1. Creation of the analytic cohort and missing data.**

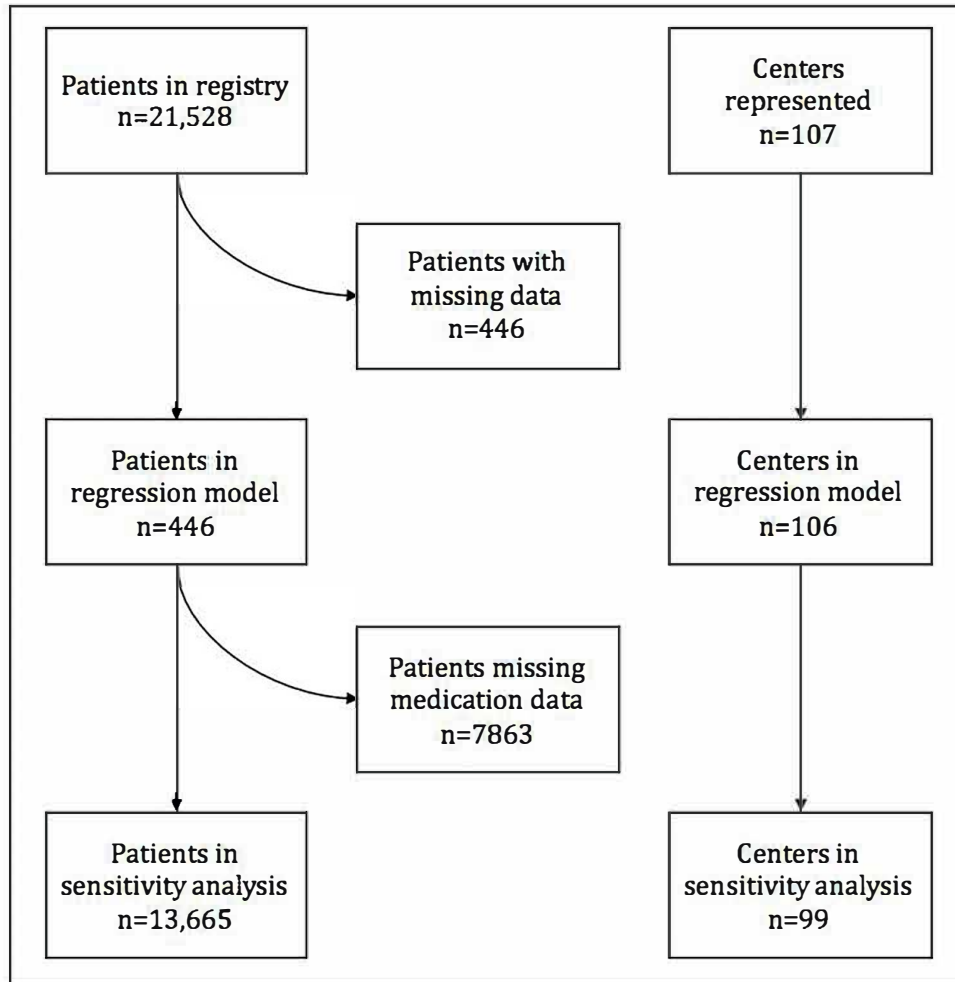

**Figure S2. Unadjusted Likelihood of Venous Thromboembolic Events by sex and race/ethnicity.**

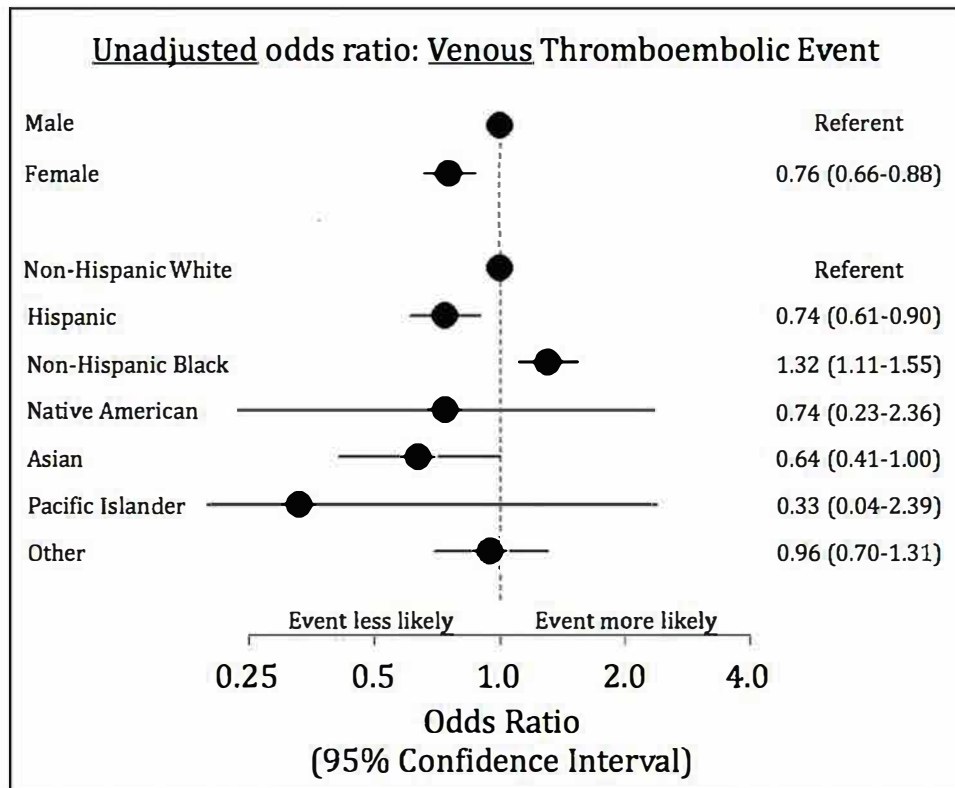

**Figure S3. Sensitivity analysis of Venous Thromboembolic Events.**

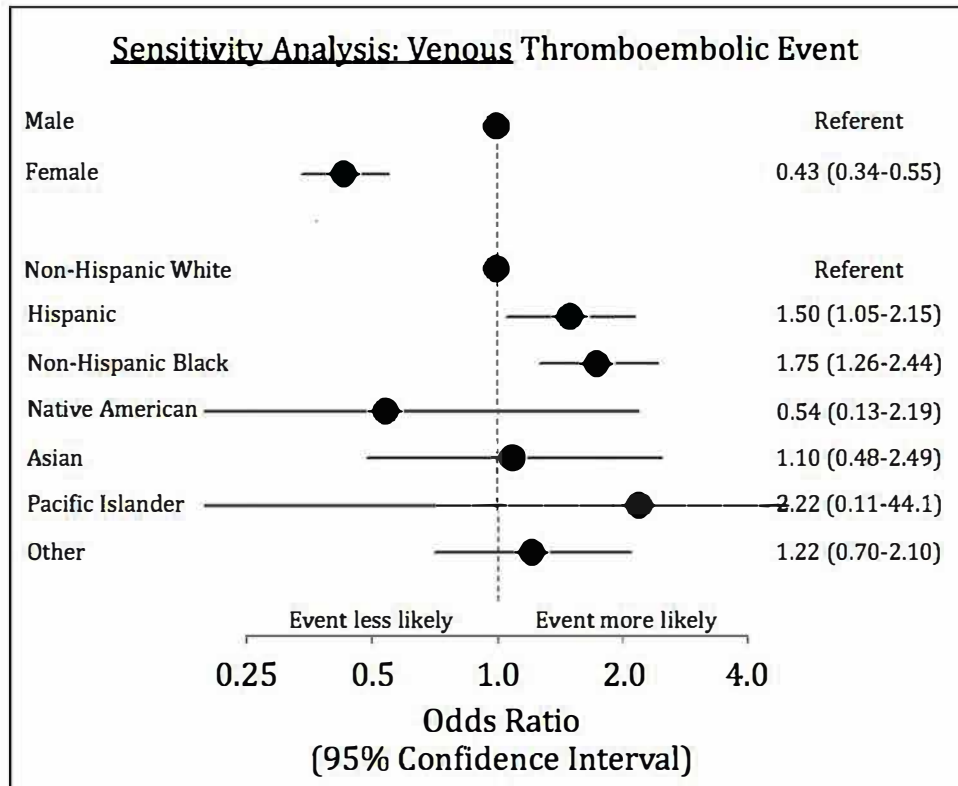



**Figure S4. Unadjusted Likelihood of Arterial Thromboembolic Events by sex and race/ethnicity.**

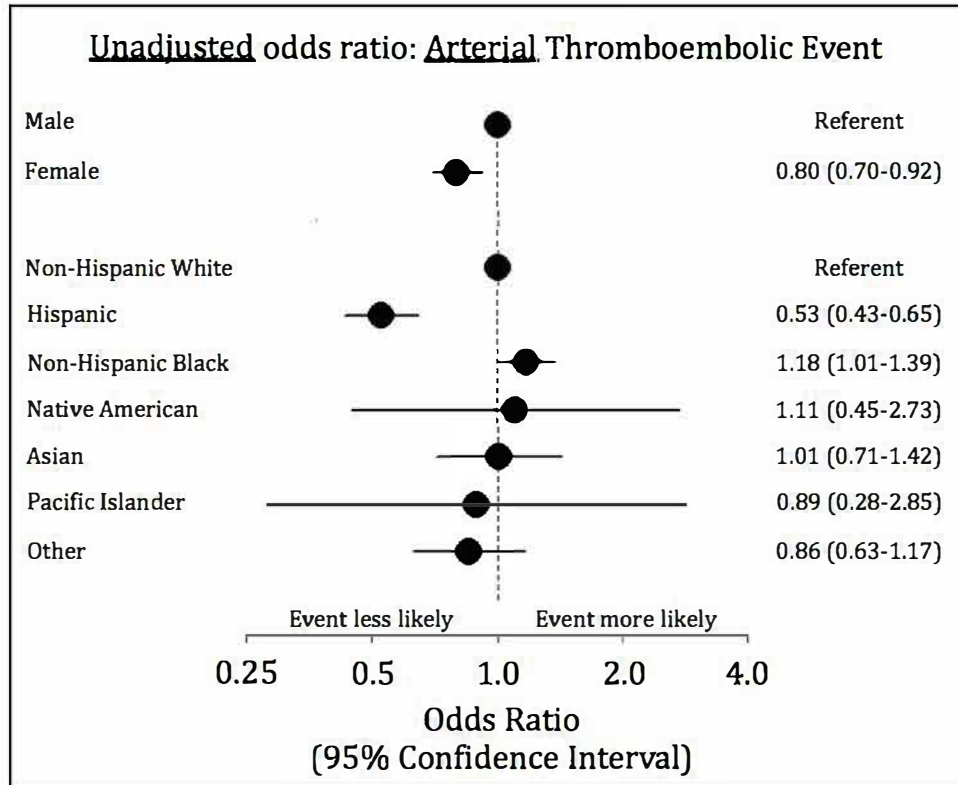

**Figure S5. Sensitivity analysis of Arterial Thromboembolic Events.**

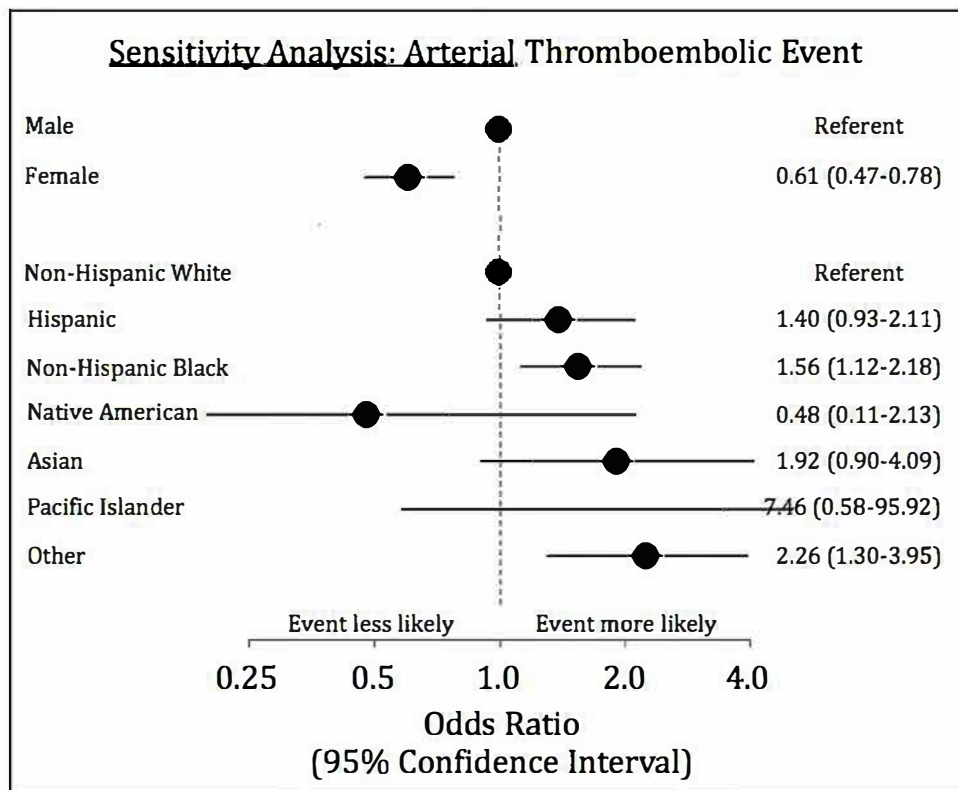

Supplement: JAH3-10-e022829-s001.pdf [file JAH3-10-e022829-s001.pdf]
